# Supplementary material
Source: PubMed Central journal article supplement (PMC2754888)
Supplement: supp_109.076869_biolreprod.109.076869-1.pdf [file supp_109.076869_biolreprod.109.076869-1.pdf]

Suo et al., Supplemental Table S1. Primers used for qRT-PCR.

| Gene name     | Sequence (5'-3')          | Size (bp) |
|---------------|---------------------------|-----------|
| <i>PDGFA</i>  | F: GGTGGTCACAGGTGCTTTTT   | 185       |
|               | R: AAACCACTTAAGGCTCTCAGGA |           |
| <i>PDGFB</i>  | F: TGAGAAAGATCGAGATTGTGCG | 120       |
|               | R: GGGCTTCGGGTCACAGG      |           |
| <i>PDGFC</i>  | F: GAATGTCAATGTGTCCCAAGCA | 151       |
|               | R: TGCTCCCTCTGCACACACAG   |           |
| <i>PDGFD</i>  | F: ATTTGGCAGGCCATCATAGA   | 199       |
|               | R: CCACAATTGACAACCTGGCTTC |           |
| <i>PDGFRA</i> | F: ACAACAGCGGCCTTTTTTGTG  | 125       |
|               | R: AATGTGCCTGCCTTCAAGCTC  |           |
| <i>PDGFRB</i> | F: TGAGAAAGATCGAGATTGTGCG | 120       |
|               | R: GGGCTTCGGGTCACAGG      |           |
| <i>GAPDH</i>  | F: GAAGGTGAAGGTCGGAGTCA   | 199       |
|               | R: GACAAGCTTCCCGTTCTCAG   |           |

F: forward; R: reverse
